# Supplementary material
Source: Research Square preprint supplement (doi:10.21203/rs.3.rs-9294707/v1)
Supplement: Supplementary file 1 [file fdc91bfe5de46648a1f0525b.pdf]

## **Supplementary Material**

### **Comprehensive Ready-to-Print Guide for VeNFLoPi**

**Versatile Night/Day Framework for Longitudinal Pi-based Imaging  
Open-source Camera Setup For Behavioral Assays**

***Tara C. Delorme, Mackenzie C. Gamble, Ryan W. Logan***

# VeNFLoPi Installation Guide

## Flashing Your Raspberry Pi 4B MicroSD Card

- A. Download **Raspberry Pi Imager**: <https://www.raspberrypi.com/software/>
- B. Insert microSD card into your computer, using an adapter if necessary.
- C. Under **Device**, select Raspberry Pi 4. Then hit **next**.
- D. Under **OS**, select **Use custom**. Then hit **next**.
- E. Download the **.img file** of the latest **VeNFLoPi** release via our GitHub at the following: <https://github.com/taracdelorme-cloud/VeNFLoPi> and select it following step D.
- F. Under **Storage**, select your microSD (e.g., **Generic MassStorageClass Media**). Then hit **next**.
- G. Under **Writing**, confirm the operating system is **VeNFLoPi**. Then hit **Write**.
- H. Select **'I UNDERSTAND, ERASE AND WRITE'**.
- I. MicroSD is finished and automatically ejected. Choose to write another microSD or finish.

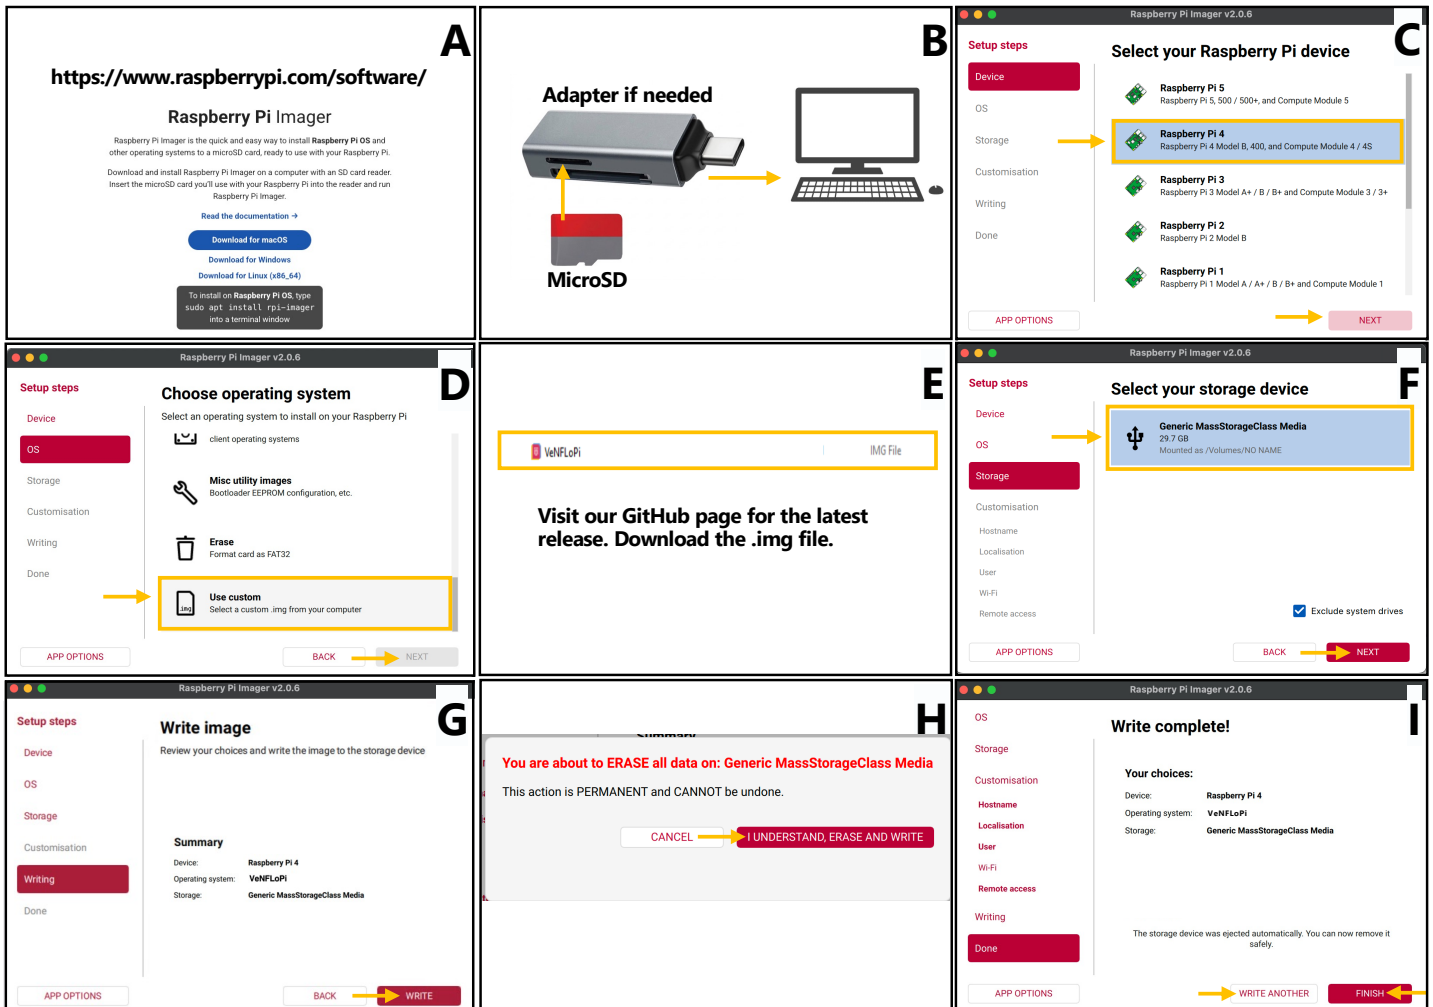

**A** <https://www.raspberrypi.com/software/>

**B** Adapter if needed

**C** Select your Raspberry Pi device

**D** Choose operating system

**E** Visit our GitHub page for the latest release. Download the .img file.

**F** Select your storage device

**G** Write image

**H** You are about to ERASE all data on: Generic MassStorageClass Media

**I** Write complete!

# Raspberry Pi 4B Configuration

## Layout of onboard interfaces and port mapping

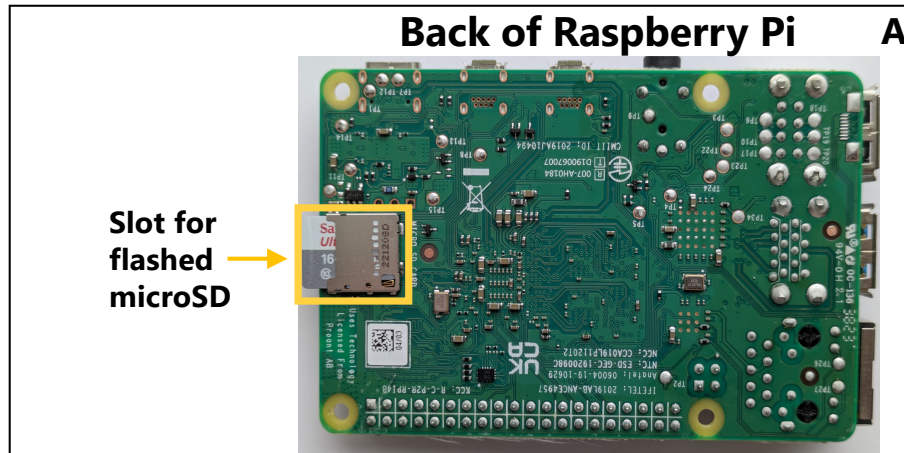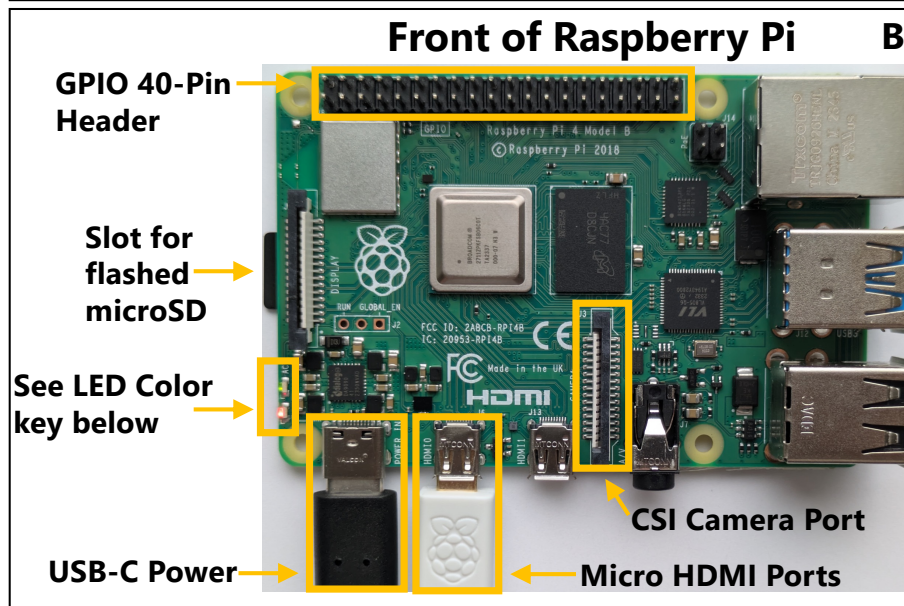

| Long | Short | Meaning                       |
|------|-------|-------------------------------|
| 0    | 3     | Generic failure to boot       |
| 0    | 4     | Start*.elf not found          |
| 0    | 7     | Kernel image not found        |
| 0    | 8     | SDRAM failure                 |
| 0    | 9     | Insufficient SDRAM            |
| 0    | 10    | In HALT state                 |
| 1    | 2     | SD card overcurrent           |
| 2    | 1     | Partition error (not FAT)     |
| 2    | 2     | Failed to read from partition |
| 2    | 3     | Extended partition not FAT    |
| 2    | 4     | File signature/hash mismatch  |
| 3    | 1     | SPI EEPROM error              |
| 3    | 2     | SPI EEPROM write protected    |
| 3    | 3     | I2C error                     |
| 3    | 4     | Secure boot config invalid    |
| 4    | 4     | Unsupported board type        |
| 4    | 5     | Fatal firmware error          |
| 4    | 6     | Power failure type A          |
| 4    | 7     | Power failure type B          |

# Camera Module Modification and Integration

## Wide-angle Lens Replacement and Ribbon Cable Assembly

- A. Unscrew and **remove IR lights** from the main camera mount.
- B. If modifying the camera for a wider field of view, carefully **unscrew original lens**.
- C. **Screw new lens in**. There should be no resistance when screwing in the lens! It is sometimes helpful to start by applying downward pressure, followed by a slight left-hand turn (counter-clockwise) to set the lens and then begin to screw it in by turning the lens to the right (clockwise). Be careful not to over turn it at the end as well.  
Note: You can use a graphite pencil to dry lubricate the lens thread, but generally it should go in with no resistance if the threading is undamaged.
- D. **Adjust focus** by gently rotating lens clockwise or counterclockwise until the image is clear.
- E. **Attach the ribbon cable** end by aligning the connector tabs with the Raspberry Pi port. Lift the black locking tab on the Raspberry Pi camera port, insert the ribbon cable fully with the metal contacts facing the connector, then press the tab back down to lock it in place.
- F. If all steps are completely correctly you setup should now look like F.

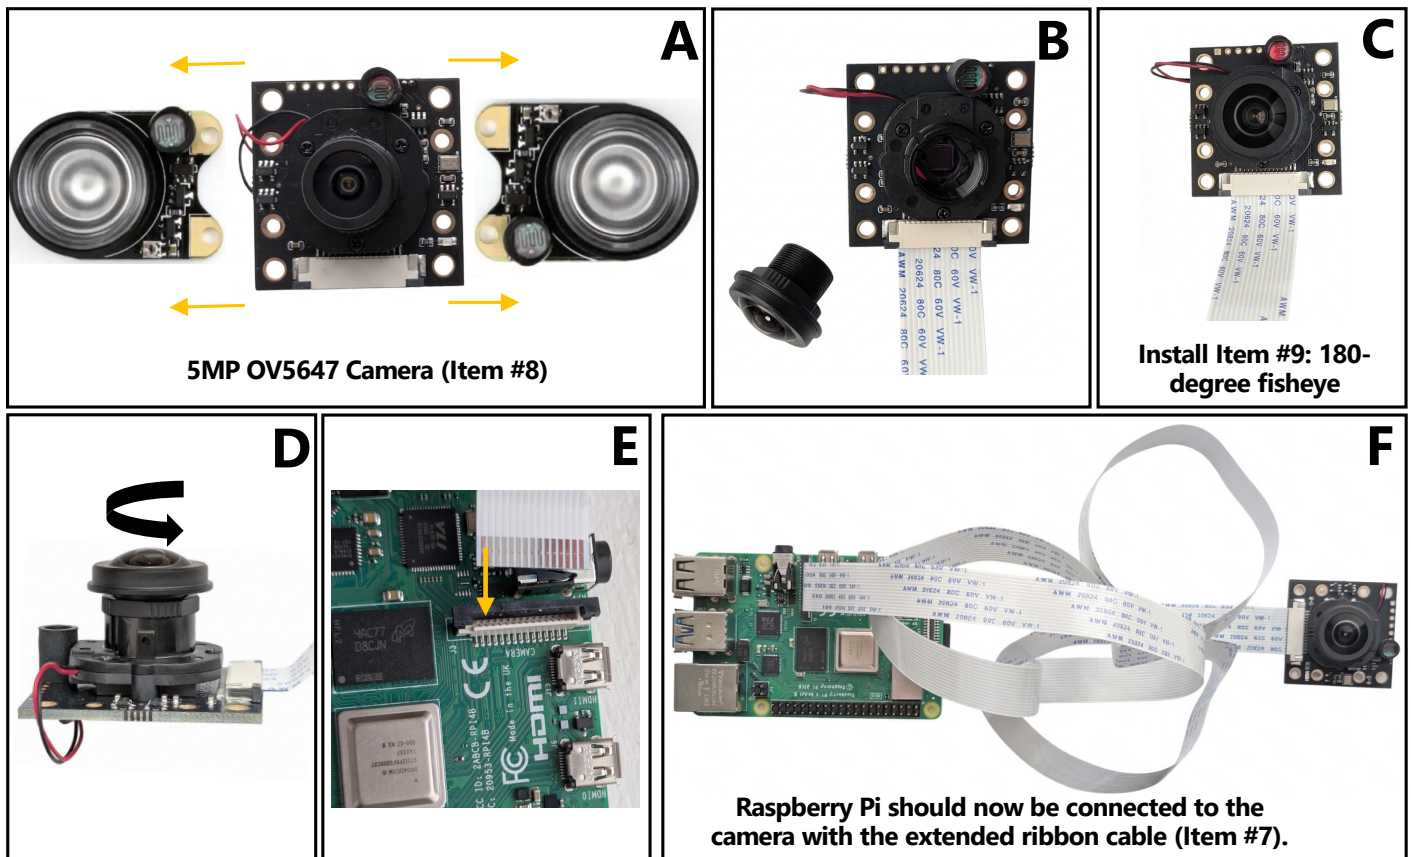

# IR LED Light Assembly

## Custom IR LED Wiring and Modular Light Assembly

- A. As described by the **Glover Lab**, the **original IR LEDs** supplied with the camera can be reused. However, they should be removed from the camera assembly and repositioned so the IR lighting is separate from the camera lens, allowing improved placement control and more flexible illumination. **Add heat sinks** to the back of each IR LED
- B. Next, four sets of wires need to be crafted: **3 + 4** connects the two IR lights together
- C. **5 + 6** connects the IR lights to the Pi board
- D. **IR sensors (1 + 2)** connected using wires 3, 4 and 5.
- E. **Front view:** Ensure all screws are fully tightened.
- F. **Connection:** Plug Wire 6 into the Raspberry Pi board (details on p. 6)
- G. Note: **Premade wires (Item #21)** can be used instead of assembling wires manually. If you choose to manually make, follow instructions: Strip the wire. To make #3 and #4, attach two ring terminals (item #16) to one black and one red wire cut to a short length (item #17) separately via heat shrink tubing (item #18). To make #5, the wire is left long and one end contains the ring terminal while the other features a male two pin housing connector (item #15). The last cable involves taking a red and black wire (item #17) cut to medium length and fit one female two pin housing connector (both red and black feed into) and then two female one pin housing connectors (one for black and one for red).

Materials needed to construct IR lights

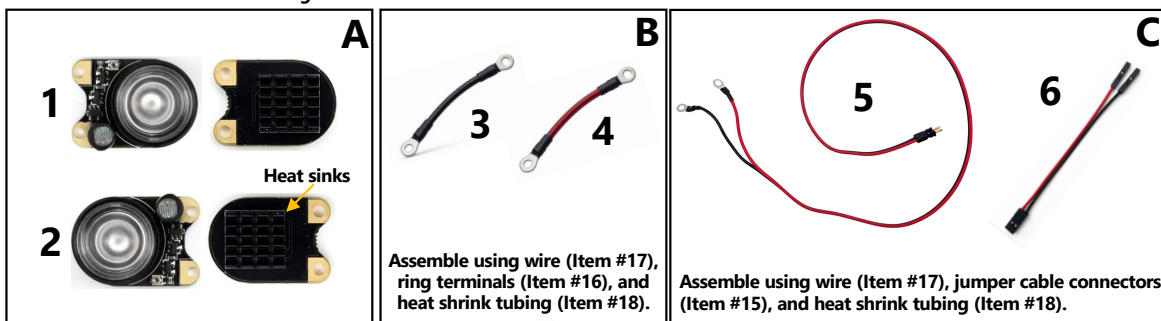

Assembly of IR lights

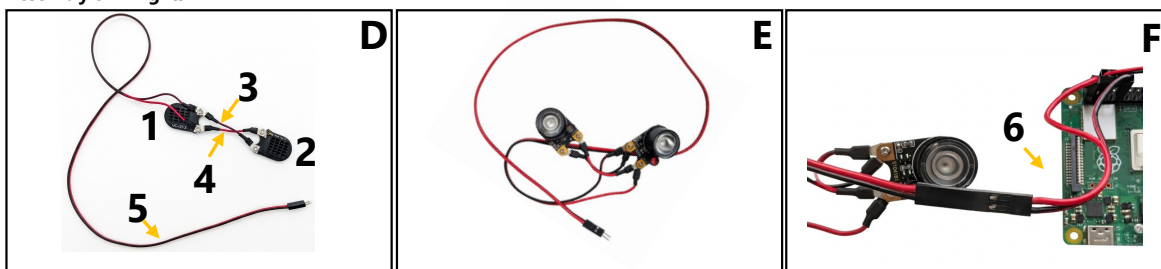

Note: Premade wires (Item #21) can be used instead of assembling wires manually. If you choose to manually make, follow instructions below.

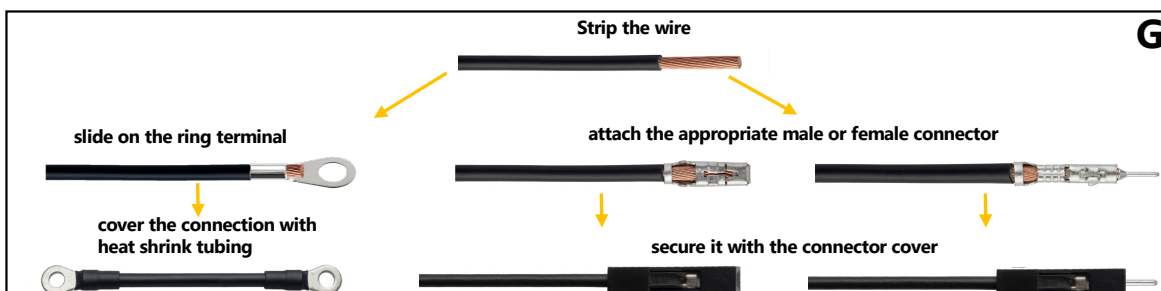

# IR LED Light Case

## 3D-Printed IR LED Enclosure and Placement Guidelines

STL files of the 3D-printed components (designed by the **Glover Lab**) can be found here: <https://www.thingiverse.com/gloverlab/designs>. We used FDM printer and PETG Filament.

A. Four individual components make up the case including:

1. **Pi\_LED\_Base**
2. **Pi\_LED\_Arm\_5CM\_M2F**
3. **Pi\_LED\_Case\_Bottom\_w\_Mount**
4. **Pi\_LED\_Case\_Top**

We opted to use metal nuts and screws including:

5. **#4-40 × 1" screw = 2-4 pieces**
6. **#4-40 nut = 2-4 pieces**

B. Be sure to position camera to get good even illumination and everything you want captured in frame.

Some **tips** below:

1. *Angle IR LED slightly away from the lens to avoid glare.*
2. *Keep LED ~2–5 cm from the camera for even illumination.*
3. *Use a diffuser (frosted tape or plastic) to spread light evenly.*
4. *Adjust IR intensity or camera exposure to prevent over/underexposure.*
5. *Avoid shiny surfaces that can reflect IR back into the lens.*
6. *Secure the LED firmly with zip ties, standoffs, or mounts.*
7. *Test the setup before filming to check coverage and shadows*

C. We removed the front panel (4) and used zip ties to secure the IR LED, as positioning the front panel proved difficult.

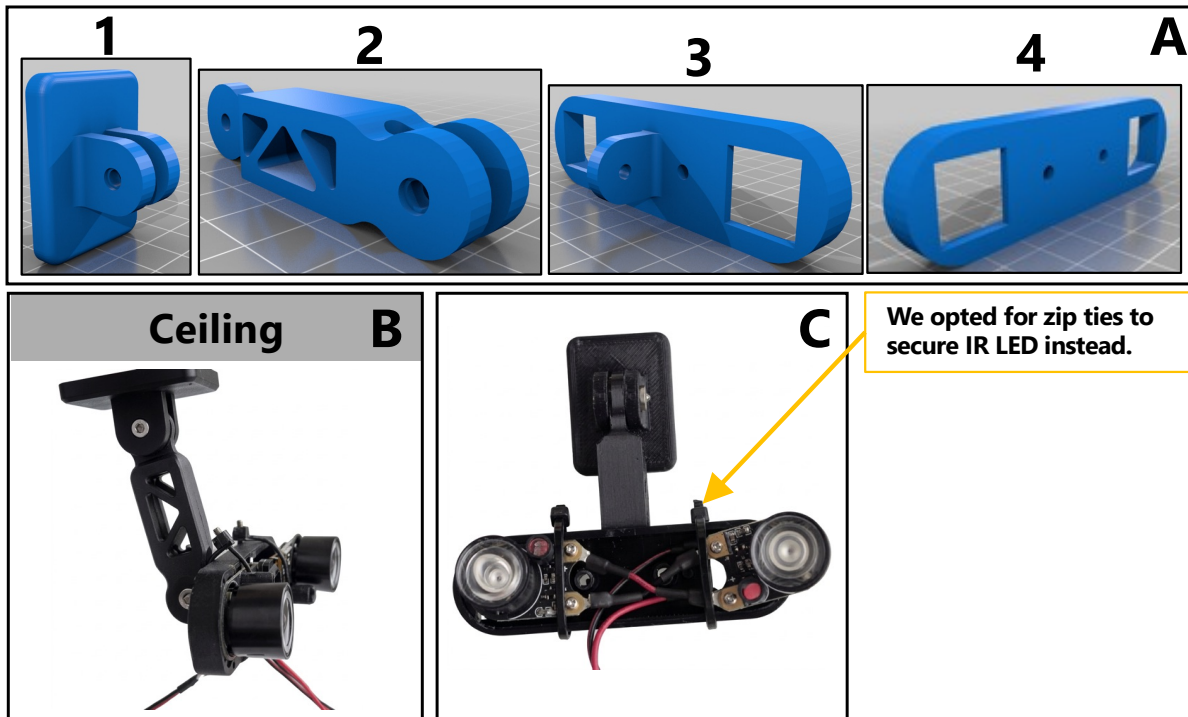

## Camera Arm and Case

### 3D-Printed Camera Arm and Protective Case Assembly

STL files of the 3D-printed components (designed by the **Glover Lab**) can be found here: <https://www.thingiverse.com/gloverlab/designs>. We used FDM printer and PETG Filament.

A. Eight individual components make up the arm and case including:

1. Pi\_Cam\_Rod\_Base
2. Pi\_Cam\_Ring\_180D
3. Pi\_Cam\_Arm\_7CM\_M2F
4. Pi\_Cam\_Arm\_7CM\_M2F
5. Pi\_Cam\_Arm\_7CM\_M2M\_180D
6. Pi\_Cam\_Ring\_90D
7. Pi\_Cam\_Case\_Bottom\_w\_Rod
8. Pi\_Cam\_Case\_Top

We opted to use metal nuts and screws instead of 3D-printed versions:

9. #4-40 × 1" screw = 10 pieces
10. #4-40 nut = 10 pieces

B-D. Front, Side and Back view of camera arm and case.

E-F. Top and side view of chamber

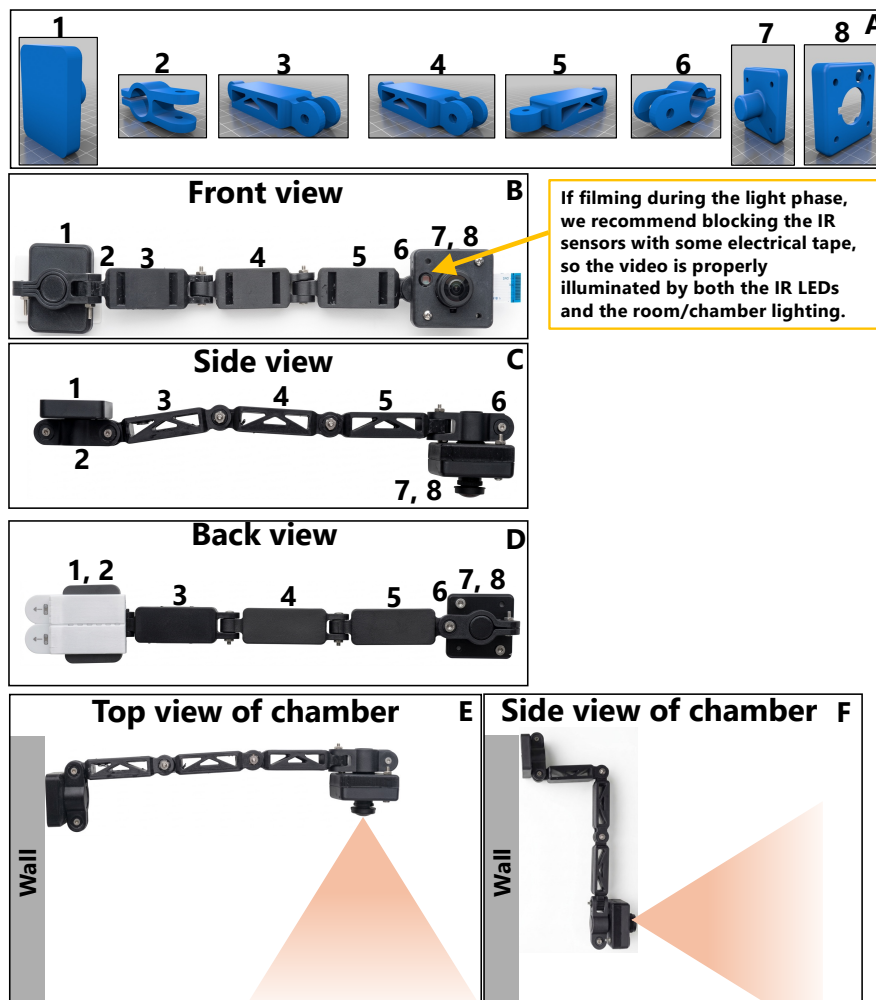

# Attach component to your Raspberry Pi

## Wiring Schematic

- A. Display of the 40-pin GPIO header of the Raspberry Pi 4B with specific pin assignments for external components. Wiring connections are assigned as follows:
  - B. **Custom IR LED lighting:** The red (positive) wire is connected to Pin 1 (3.3V Power), and the black (negative) wire is connected to Pin 9 (Ground).
  - C. **Squid Button:** One yellow wire is connected to Pin 5 (GPIO 3), and the other is connected to Pin 6 (Ground).
  - D. **Cooling fan integrated into the Pi enclosure:** The red wire is connected to Pin 4 (5V Power), and the black wire is connected to Pin 14 (Ground).
- Note: The blue wire is not utilized in this configuration and should be ignored.*

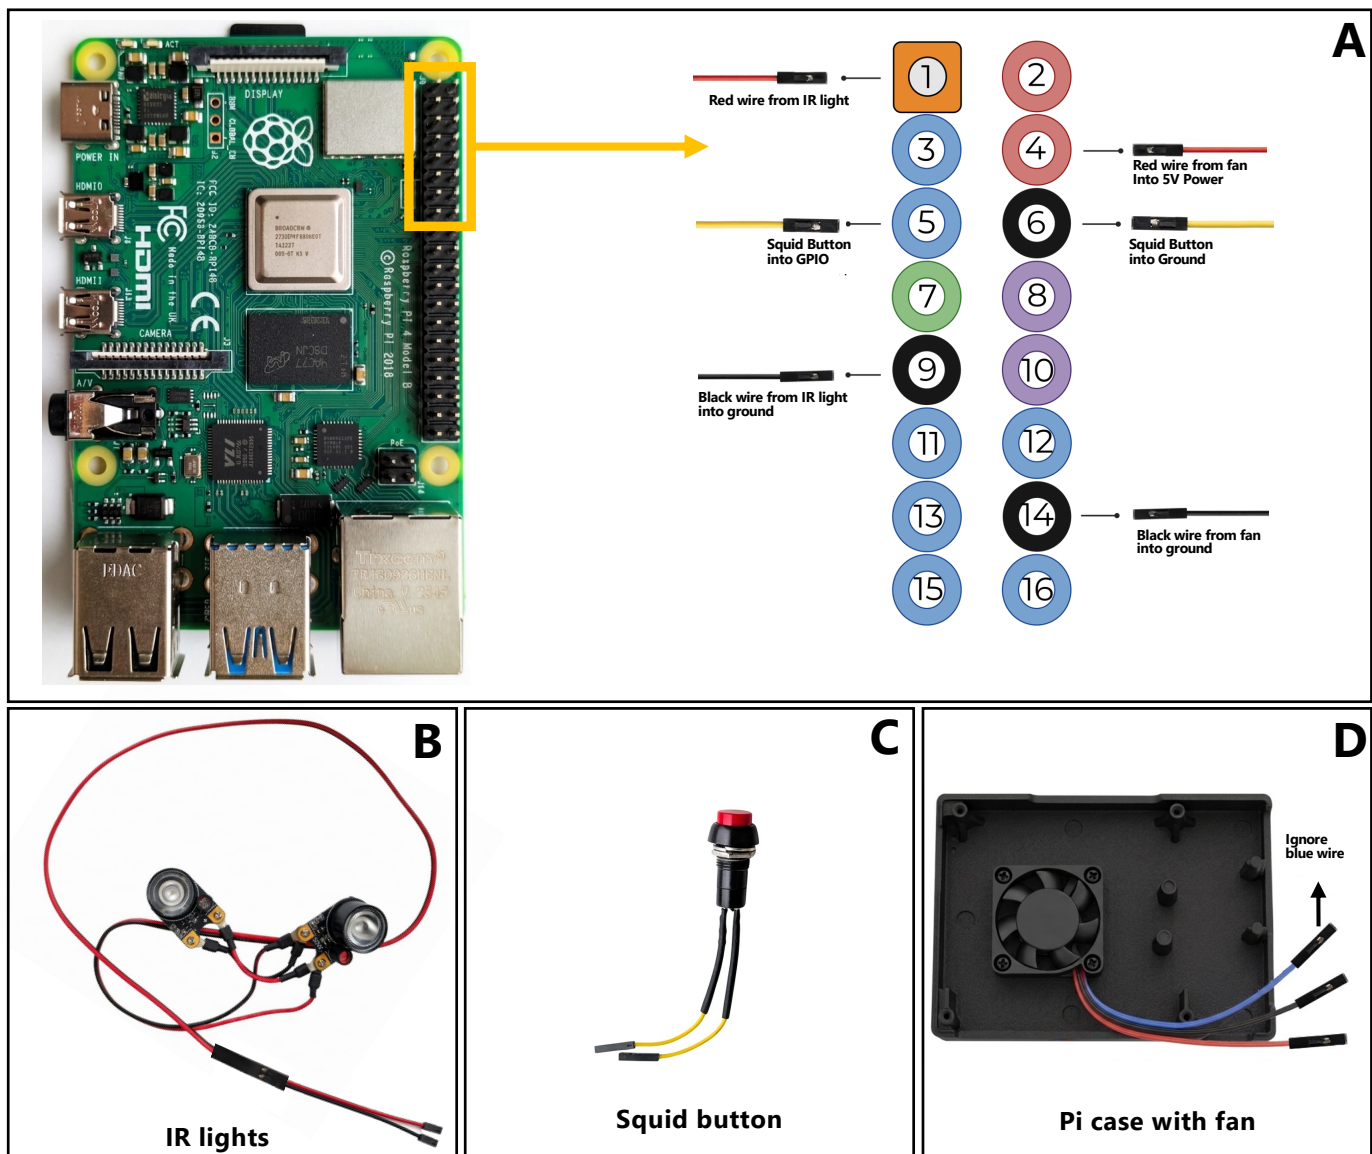

# Video acquisition

## Configuring Profiles, Resolution, and Recording Paths in OBS

- Download OBS** for free at <https://obsproject.com/download>.
- Create a profile for your project: **Go to Profile** → **New**, enter the profile name.
- Click **Optimize for Recording Only**, click **Next**.
- Set Base Resolution to 1920×1080 and FPS to 60, click **Next**, and then **Apply** the settings.  
*Note: You can customize base resolution and FPS to meet your needs, but they have to match RPi Arducam Settings*
- Setting Recording Path and Format: **Go to File** → **Settings**
- Click **Output** → **Advanced**, then select the **Recording** tab. Set the recording path to your computer, an external hard drive, or a cloud-based service like OneDrive or Dropbox. Choose **MKV** as the recording format.
- Next go to **Settings** → **Advanced**, then under **Recording**, change the file name to include your animal ID. Check "Automatically remux to MP4."

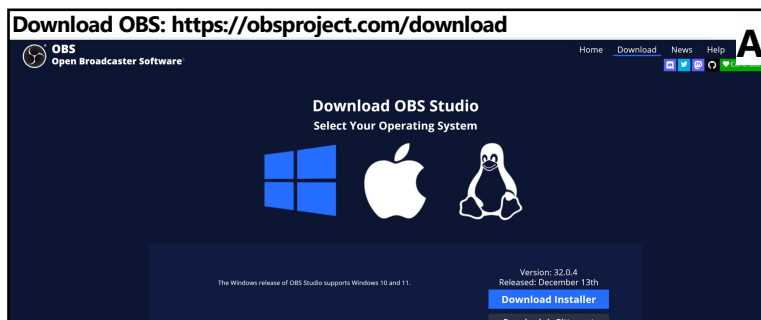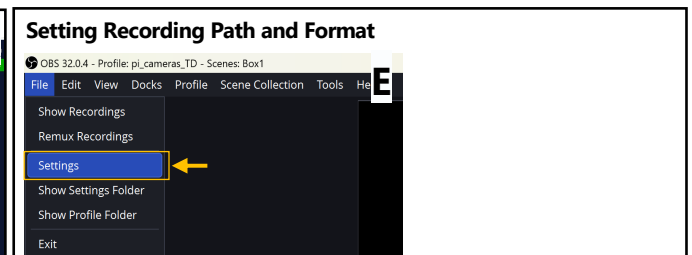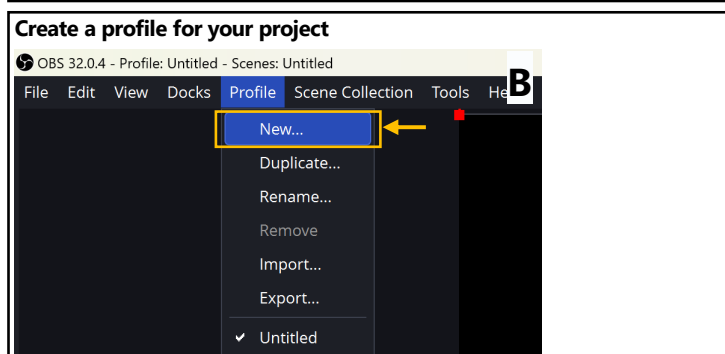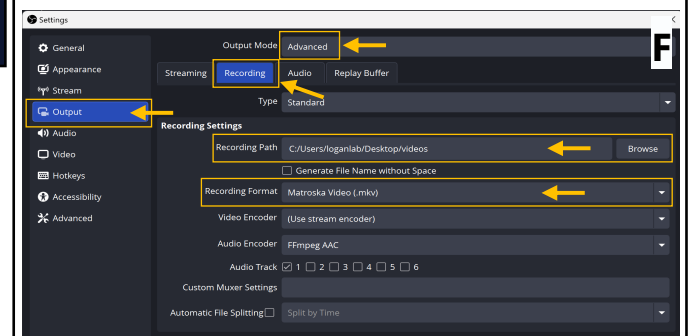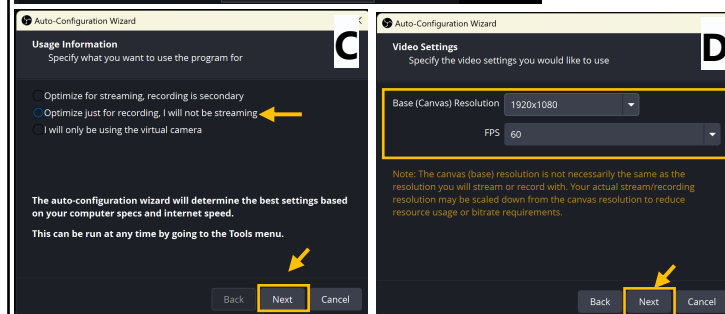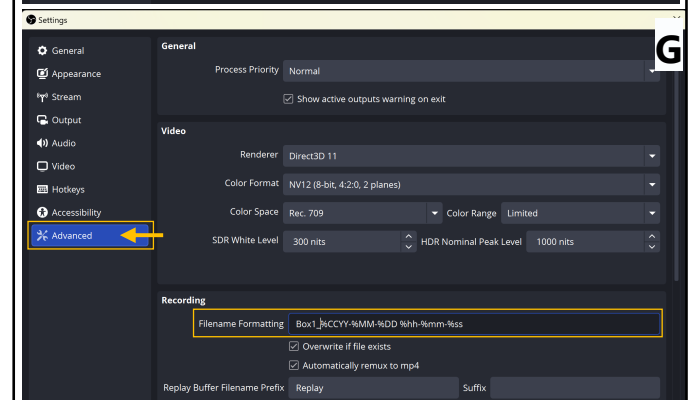

# Multi-Camera Software Setup

## Creating Scene Collections and Adding Camera Sources in OBS

- Go to **Scene Collection** → **New** and create a separate collection for each chamber with a camera you are recording from.
- Select a scene collection, click **Add Source**
- Choose **Video Capture Device**.
- Name the new source, and click **OK**.
- Repeat these steps for all scene collections, opening a new instance of OBS each time.
- It will tell you an instance is already running but select **Launch Anyway**.
- Make sure the recording parameters (FPS and Resolution) match between OBS and the RPi device set-up.
- Once done you should have a separate window for each recording.

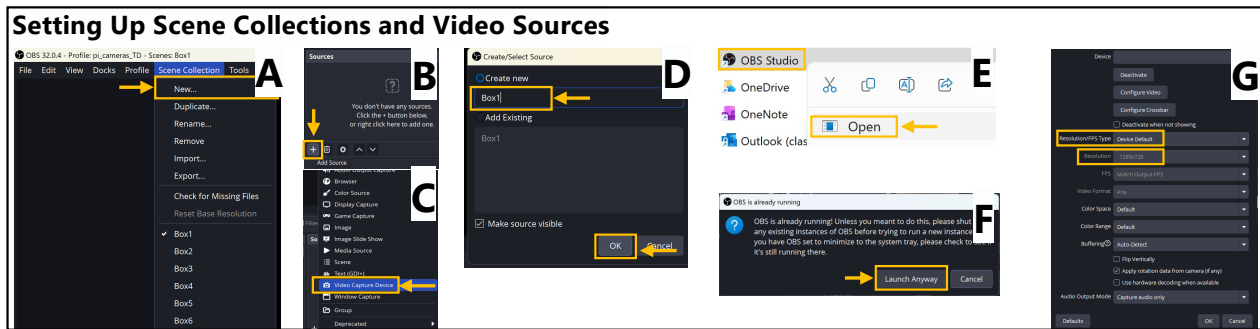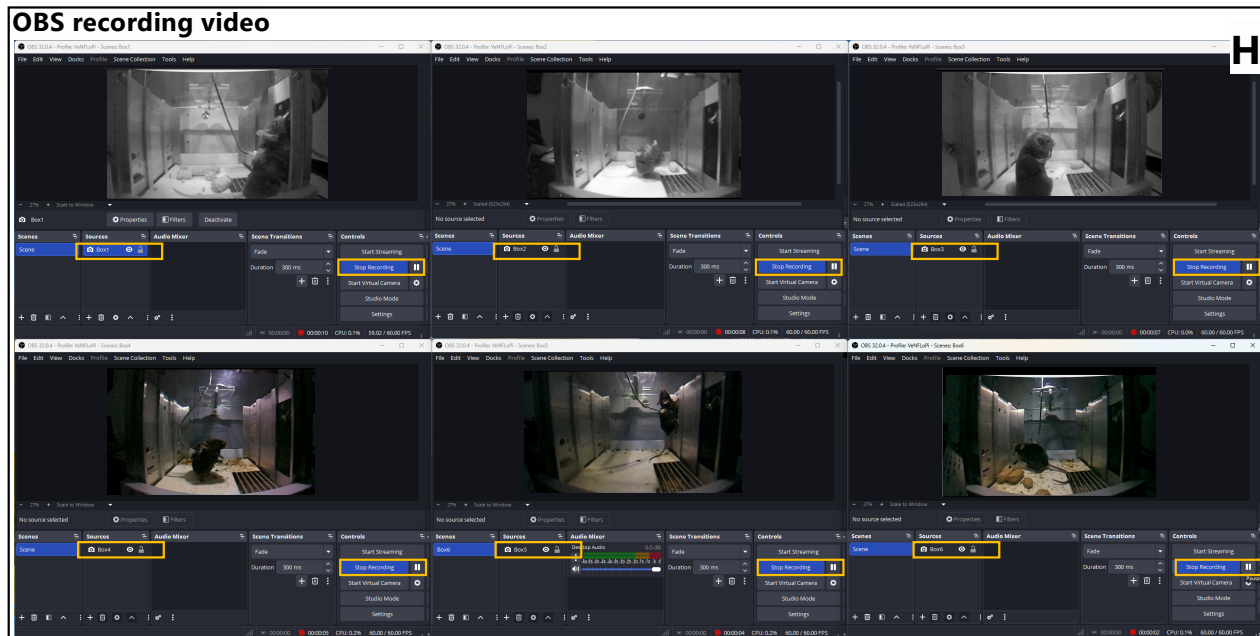

# Applying Auto Start-Stop Settings

## Configuring Automated On/Off Recording with Advanced Scene Switcher

- Download the Advanced Scene Switcher plugin from the OBS Project website:  
<https://obsproject.com/forum/resources/advanced-scene-switcher.395/>
- After downloading, extract the ZIP file and follow the included instructions to install the plugin into your OBS plugins folder.
- Restart OBS and navigate to **Tools** → **Advanced Scene Switcher**
- **Macro**. Click the + button to create a new macro, provide a name, and click OK.
- Select the macro, add a Condition: **If** → **Recording** → **Recording Running**.  
Then add the following Actions in sequence: **Wait** → **Fixed** → **1 hour** (or any desired interval), **Recording** → **Stop**, **Wait** → **Fixed** → **same interval**, **Recording** → **Start**. To activate the macro, ensure the checkbox is selected; to deactivate it, clear the checkbox.

### Advanced Scene Switcher to Automatically Start and Stop Recording in OBS

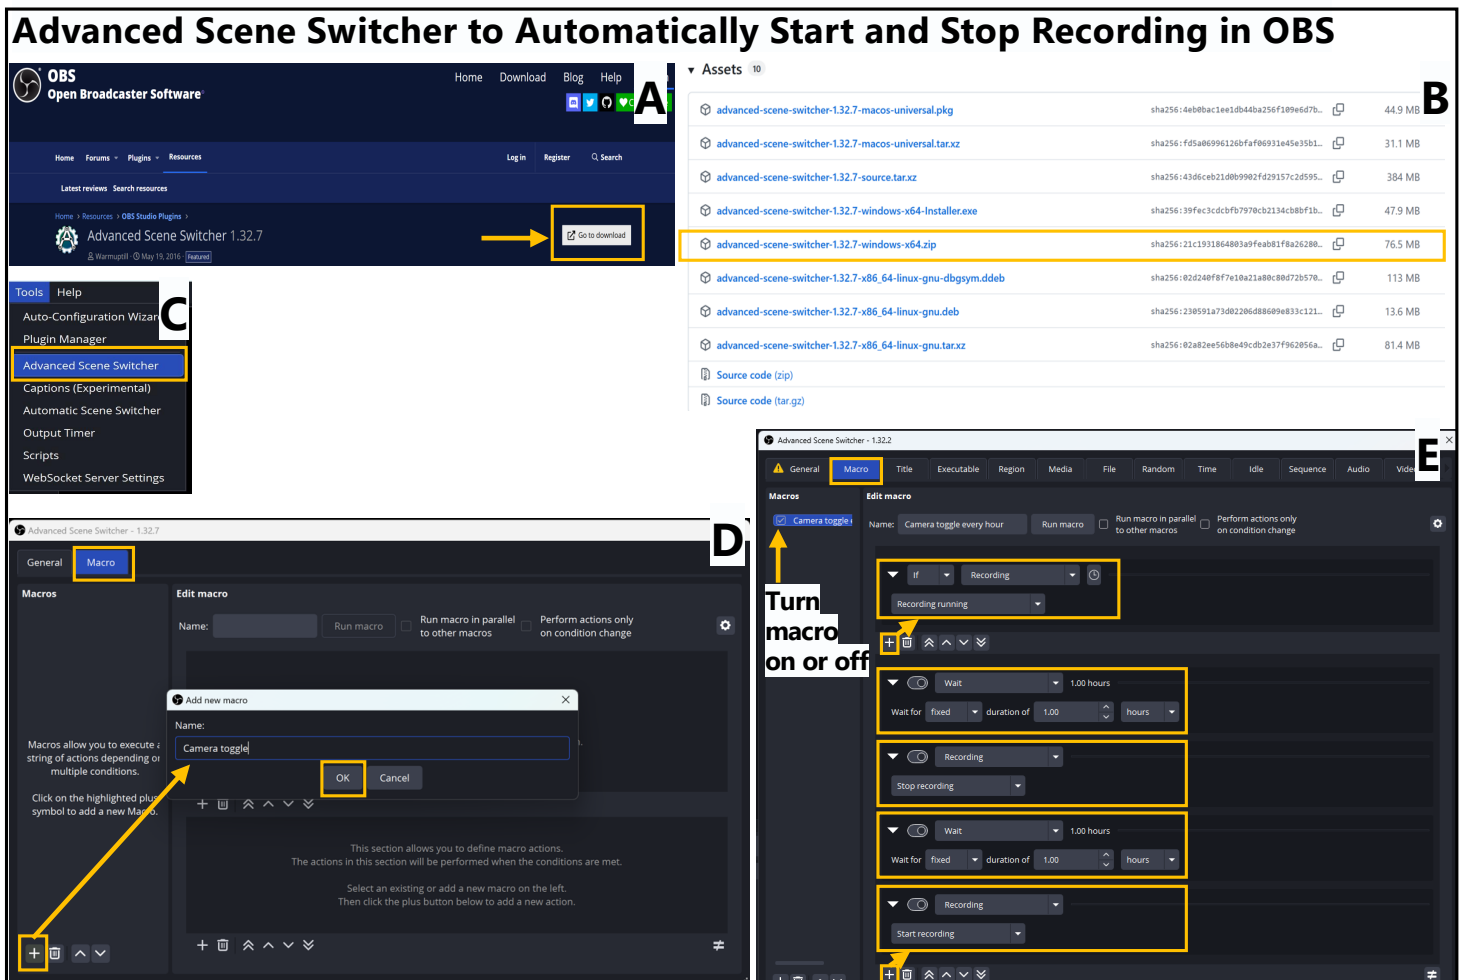

**A** Screenshot of the OBS Project website showing the download button for the Advanced Scene Switcher 1.32.7 plugin.

| Asset Name                                                 | SHA256 Hash                              | Size    |
|------------------------------------------------------------|------------------------------------------|---------|
| advanced-scene-switcher-1.32.7-macos-universal.pkg         | sha256:4ab88ac1ee1d044a256f109e6d7b...   | 44.9 MB |
| advanced-scene-switcher-1.32.7-macos-universal.tar.xz      | sha256:f5a80699612ebfaF08931e45e35b1...  | 31.1 MB |
| advanced-scene-switcher-1.32.7-source.tar.xz               | sha256:43d6ceb21089902fd29157c2d595...   | 384 MB  |
| advanced-scene-switcher-1.32.7-windows-x64-Installer.exe   | sha256:39fec3dcdbf7978cb2134cb8bf1b...   | 47.9 MB |
| advanced-scene-switcher-1.32.7-windows-x64.zip             | sha256:21c1931864803a9f9e8b81f8a26280... | 76.5 MB |
| advanced-scene-switcher-1.32.7-x86_64-linux-gnu-dbgym.ddeb | sha256:024248f8f7e18a21a80c80d72b570...  | 113 MB  |
| advanced-scene-switcher-1.32.7-x86_64-linux-gnu.deb        | sha256:238591a73d02206d8869e833c121...   | 13.6 MB |
| advanced-scene-switcher-1.32.7-x86_64-linux-gnu.tar.xz     | sha256:02a82ee508e49c02e4e37f962956a...  | 81.4 MB |
| Source code (zip)                                          |                                          |         |
| Source code (tar.gz)                                       |                                          |         |

**B** Screenshot of the OBS Assets page showing the download button for the Advanced Scene Switcher 1.32.7 plugin.

**C** Screenshot of the OBS Tools menu with the Advanced Scene Switcher option highlighted.

**D** Screenshot of the Macro configuration window showing the name 'Camera toggle' and the OK button.

**E** Screenshot of the Macro editor interface showing the configuration for the 'Camera toggle' macro. The macro is set to run when 'Recording' is 'Recording running'. The actions are: Wait (Fixed, 1.00 hours), Stop recording, Wait (Fixed, 1.00 hours), Start recording.

**Turn macro on or off** (Text annotation pointing to the macro toggle switch in the Macro editor)

# Applying Shader Settings

## Applying Fisheye Correction Using the OBS ShaderFilter Plugin

- Install OBS ShaderFilter plugin: Go to its GitHub page <https://github.com/Oncorporation/obs-shaderfilter>.
- Navigate to **Releases** → **Assets**.
- You should see a file like obs-shaderfilter-win.zip. Download and extract this ZIP file.
- Inside the extracted folder, locate the data and obs-plugins folders, and move both into your OBS Studio installation directory on your desktop, replacing or merging with any existing folders as needed.
- Install Fisheye shader.
- Navigate to **data** → **examples** in the extracted **ShaderFilter** folder and locate the file **fisheye.shader**.
- Move or copy this file into your OBS installation at **Desktop** → **obs-studio** → **data** → **obs-plugins** → **obs-shaderfilter** → **examples**.
- Then, open **OBS** go to **Sources** and click **Filters**.
- Choose **User Defined Shader** and give it a name.
- Click **Load Shader Text From File** to select your shader to apply ShaderFilter to your desired source.
- Click its name to adjust the Power setting to achieve the desired effect.

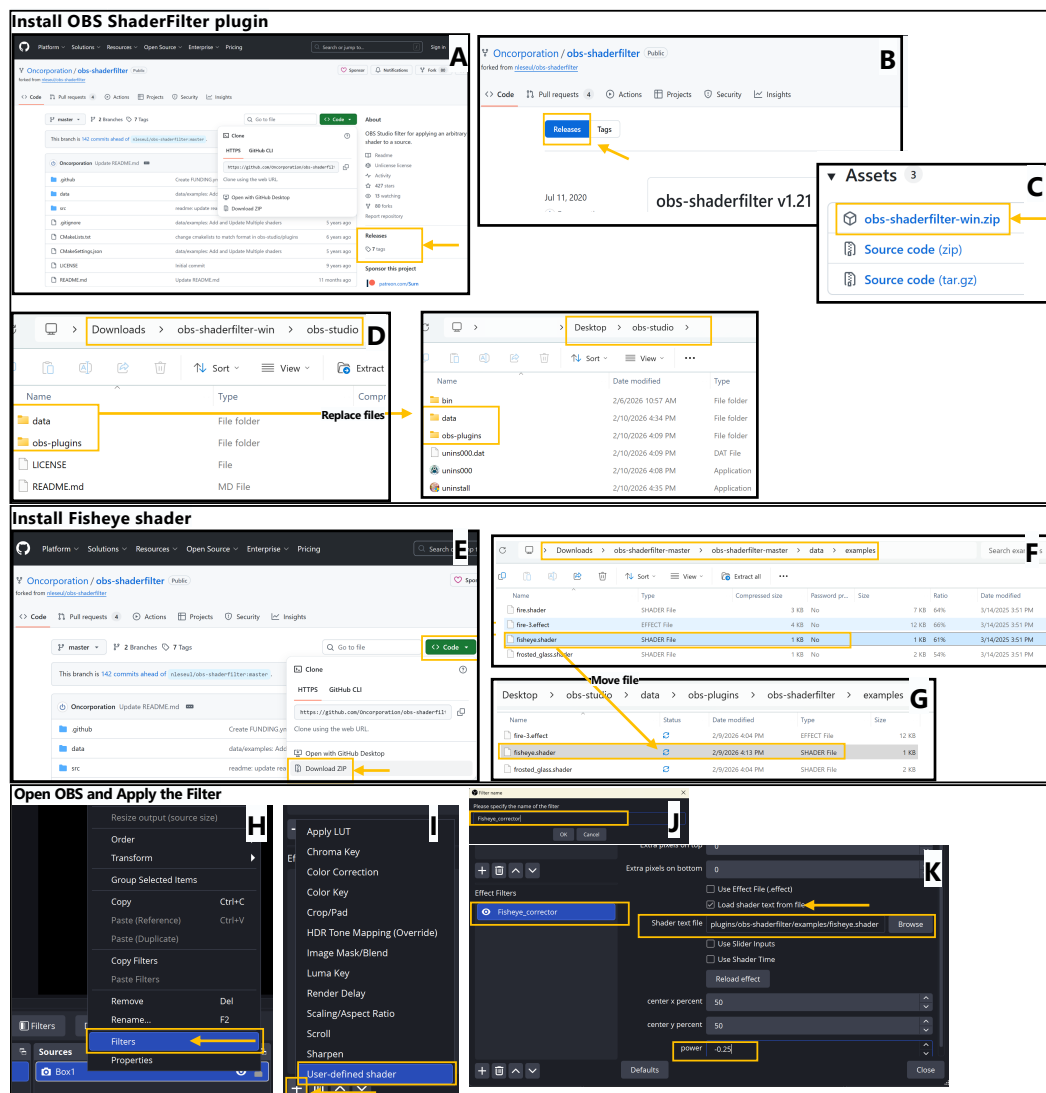

**Install OBS ShaderFilter plugin**

**A**: GitHub repository page for Oncorporation/obs-shaderfilter. The 'Releases' tab is selected.

**B**: GitHub 'Releases' page for obs-shaderfilter v1.21. The 'Assets' link is highlighted.

**C**: GitHub 'Assets' page for obs-shaderfilter v1.21. The file 'obs-shaderfilter-win.zip' is highlighted.

**D**: File Explorer showing the extracted contents of the zip file. The 'data' and 'obs-plugins' folders are highlighted. An arrow labeled 'Replace files' points to the 'obs-plugins' folder.

**E**: File Explorer showing the 'obs-shaderfilter' folder. The 'data' and 'obs-plugins' folders are highlighted.

**Install Fisheye shader**

**F**: File Explorer showing the 'examples' folder inside the 'data' folder. The 'fisheye.shader' file is highlighted.

**G**: File Explorer showing the 'examples' folder in the final destination: Desktop > obs-studio > data > obs-plugins > obs-shaderfilter > examples. The 'fisheye.shader' file is highlighted.

**Open OBS and Apply the Filter**

**H**: OBS Studio 'Sources' panel. The 'Filters' button is highlighted.

**I**: OBS Studio 'Filters' panel. The 'User-defined shader' option is highlighted.

**J**: OBS Studio 'User-defined shader' dialog box. The 'Load Shader Text From File' button is highlighted.

**K**: OBS Studio 'User-defined shader' dialog box. The 'Shader text file' path is set to 'plugins/obs-shaderfilter/examples/fisheye.shader' and the 'power' setting is set to 0.25.

# Video Stitching

## Installing Python and Miniconda for Video Stitching

- Setting up **Python** via Anaconda. Navigate to <https://www.anaconda.com/download>.
- Scroll down and click "**Download Miniconda installer.**"
- Select the appropriate **operating system** and installer (e.g., Windows 64-bit graphical installer). Download the installer and launch the executable once the download is complete. Follow the installation prompts using default settings.

Verify successful installation by opening Anaconda Prompt and running:

```
conda -version # Confirms Anaconda is correctly installed
```

### Set Up Python with Anaconda

<https://www.anaconda.com/download> **A**

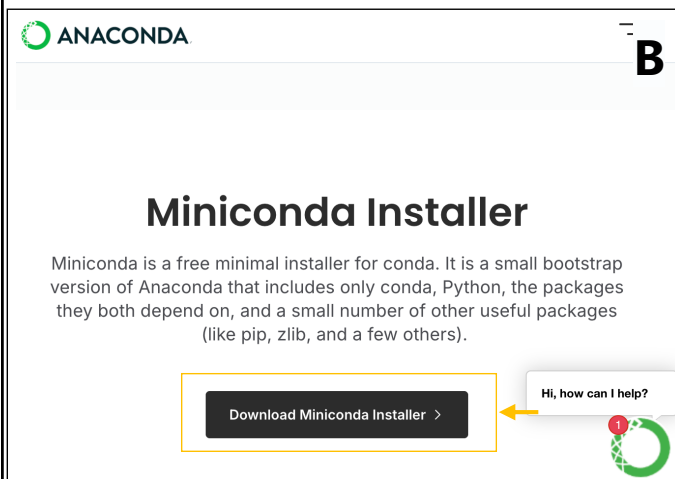

**ANACONDA**

## Miniconda Installer

Miniconda is a free minimal installer for conda. It is a small bootstrap version of Anaconda that includes only conda, Python, the packages they both depend on, and a small number of other useful packages (like pip, zlib, and a few others).

[Download Miniconda Installer >](#)

Hi, how can I help?

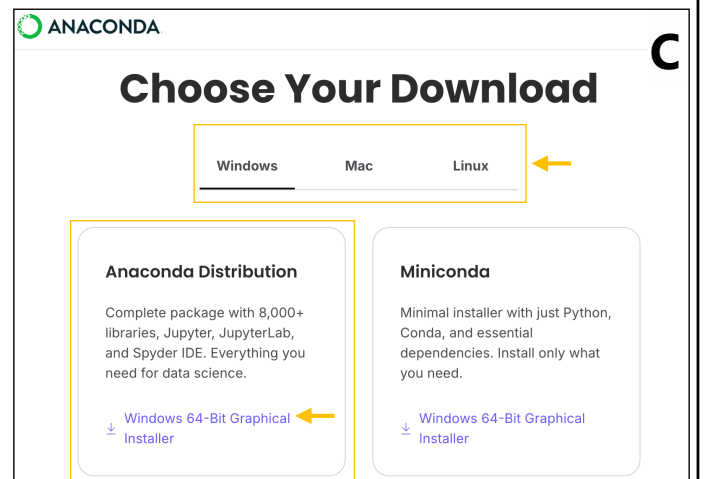

**ANACONDA**

## Choose Your Download

Windows Mac Linux

**Anaconda Distribution**

Complete package with 8,000+ libraries, Jupyter, JupyterLab, and Spyder IDE. Everything you need for data science.

[Windows 64-Bit Graphical Installer](#)

**Miniconda**

Minimal installer with just Python, Conda, and essential dependencies. Install only what you need.

[Windows 64-Bit Graphical Installer](#)

# FFmpeg Installation for Video Processing

## Installing and Configuring FFmpeg on Windows for Video Processing

- Download the **FFmpeg ZIP file** from <https://www.ffmpeg.org/download.html>.  
Hover over the Windows icon, select Windows builds from gyan.dev under Windows EXE Files, then download the ZIP file under Release builds (e.g., ffmpeg-release-essentials.zip).
- Extract the ZIP file** by right-clicking and selecting Extract All
- Select a location of your choice for the information to reside
- Confirm the extracted bin folder contains ffmpeg.exe
- Go to **Settings** → **System** → **About** → **Advanced system settings** to open System Properties
- Now via System Properties go to **Advanced** → **Environment Variables**
- In **Environment Variables** under **System variables** choose **Path** → **Edit**
- Add FFmpeg to the system PATH: Select **New** and then paste the path to the bin directory from before and click **OK** to save
- Verify installation in Anaconda Prompt by running:

```
ffmpeg -version # Version information confirms successful setup
```

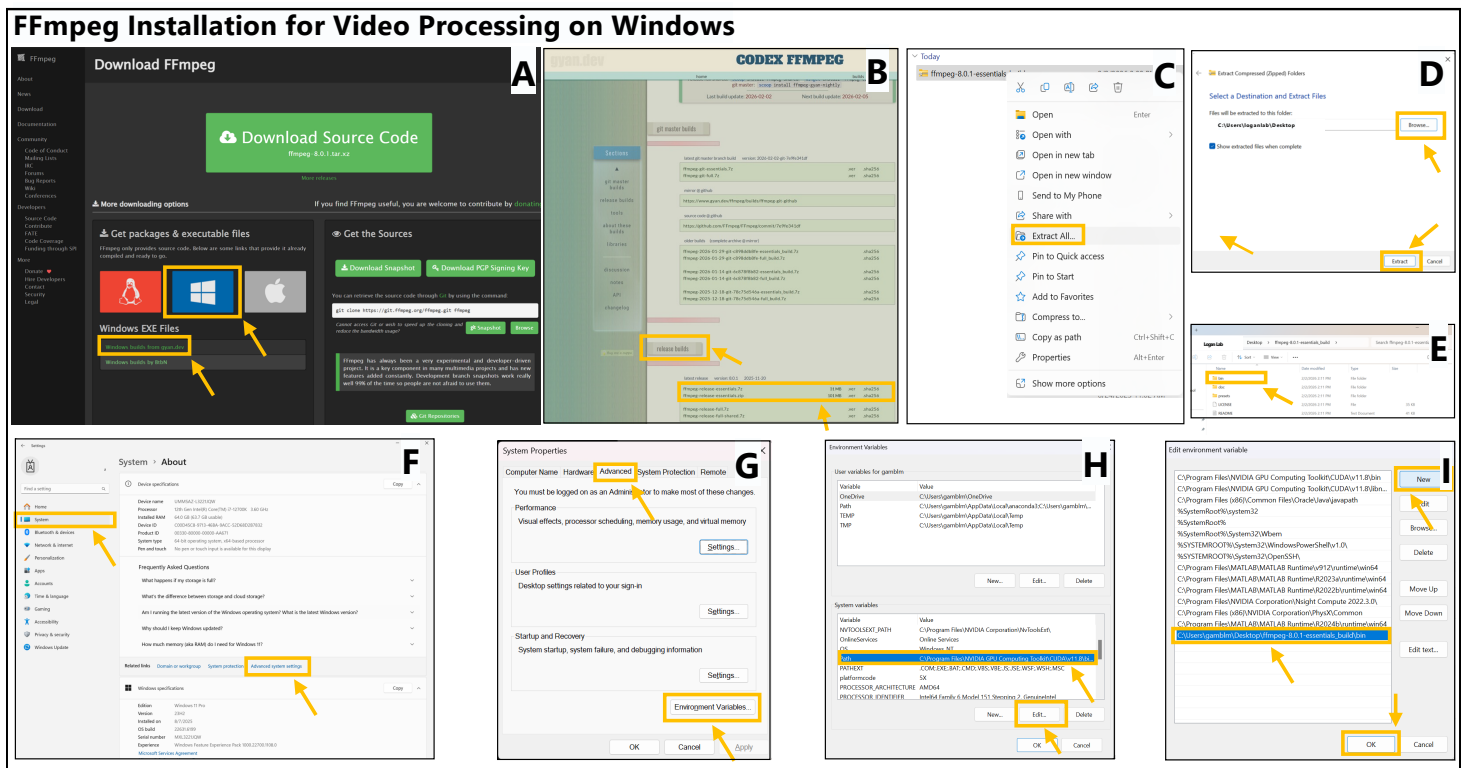

**FFmpeg Installation for Video Processing on Windows**

**A** Download FFmpeg

**B** CODEX FFmpeg

**C** Extract Compressed (Zip) File

**D** Select a Destination and Extract Files

**E** Extracted Files

**F** System > About

**G** System Properties

**H** Environment Variables

**I** Edit environment variable

## Stitch video files

### Stitching Short Video Segments into Continuous Files Using FFmpeg and Python

- A. Download [stitch\\_videos.py](https://github.com/taracdelorme-cloud/VeNFLoPi) from our GitHub at the following: <https://github.com/taracdelorme-cloud/VeNFLoPi> and save it to your desktop. A quick copy-able version is also provided below.
- B. Open [stitch\\_videos.py](#) in any text editor and update parent\_dir to the folder path where your videos are located.
- C. Open the Anaconda Prompt and run the following:

```
conda install -c conda-forge opencv # Install OpenCV dependency  
cd C:\Users\loganlab\Desktop # Navigate to script location [use your path]
```

- D. Run script:

```
python stitch_videos.py
```

- E. For each subfolder, a stitched grayscale video is saved as <subfolder\_name>\_stitched.mp4, showing sequential frames with vertical timestamps along the bottom-left and skipping near-black frames for clarity.

**That's it!**

***All you should need to stitch interval recorded videos***
